# Supplementary material
Source: publisher figshare collection journal article supplement (https://acs.figshare.com/ndownloader/files/4001776)
Supplement: Supplementary file 1 [file 4001776]

## Supporting Data Information

# Establishment of a derivatization method to quantify thiol function in sulfur-containing plasma polymer films

Damien Thiry<sup>1\*</sup>, Remy Francq<sup>1,2</sup>, Damien Cossement<sup>2</sup>, David Guerin<sup>3</sup>, Dominique Vuillaume<sup>3</sup> and  
Rony Snyders<sup>1,2</sup>

(1) *Chimie des Interactions Plasma Surface (ChIPS), CIRMAP, Université de Mons, 23 Place du Parc, B-7000 Mons, Belgium*

(2) *Materia Nova Research Center, Parc Initialis, B-7000 Mons, Belgium*

(3) *Molecular Nanostructures & Devices” group, Institut d'Electronique, Microélectronique et Nanotechnologie (IEMN), Centre National de la Recherche Scientifique (CNRS), BP60069, avenue Poincaré, F-59652 cedex, Villeneuve d'Ascq, France*

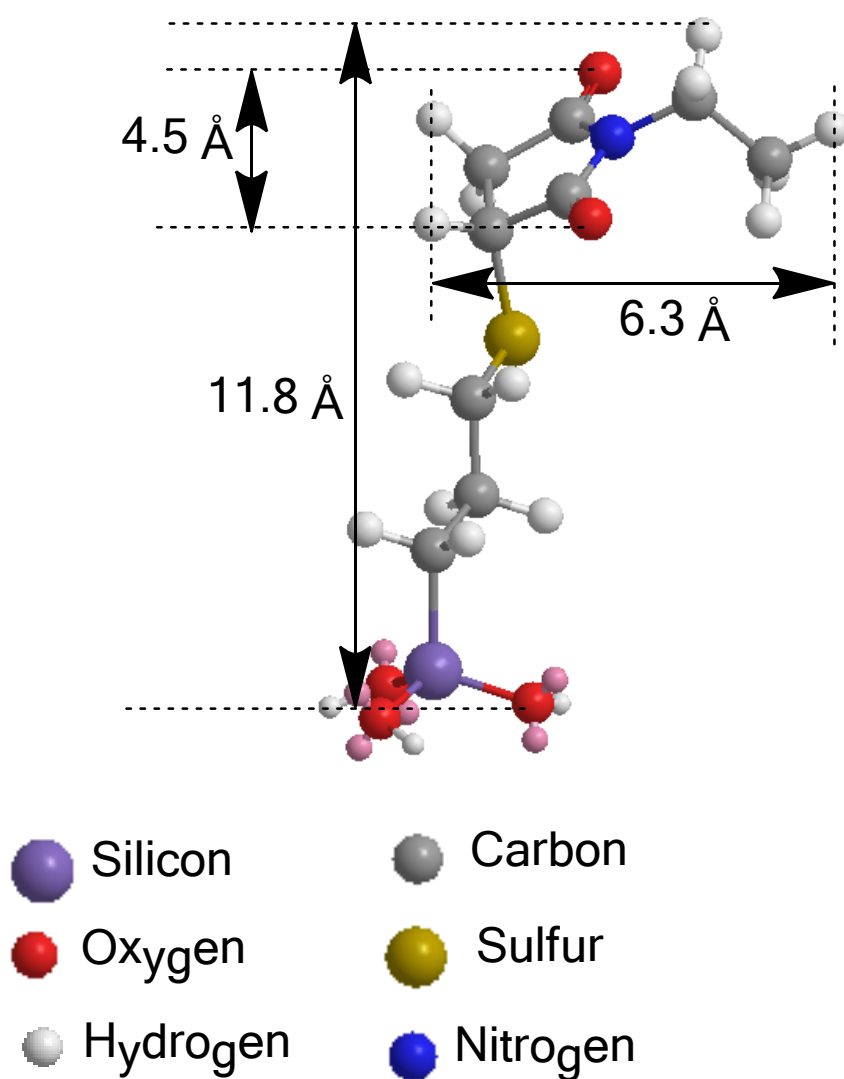

**Figure S1:** Schematic description of a MPTS-SAM exhibiting a N-ethylmaleimide grafted at the sulfur extremity. The molecule geometry was optimized using MOPAC theoretical calculations (PM3 Optimization).

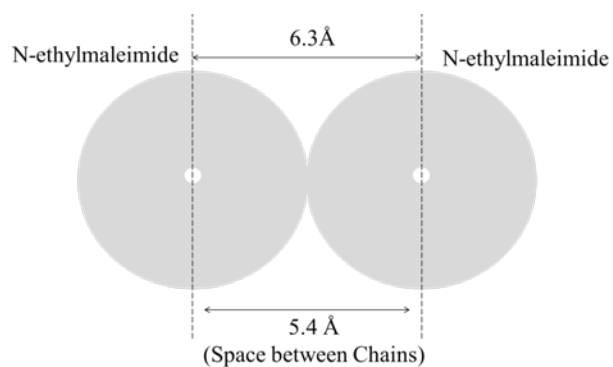

**Figure S2:** Schematic diagram of the minimal space between two N-ethylmaleimide molecules assimilated to cylinders.

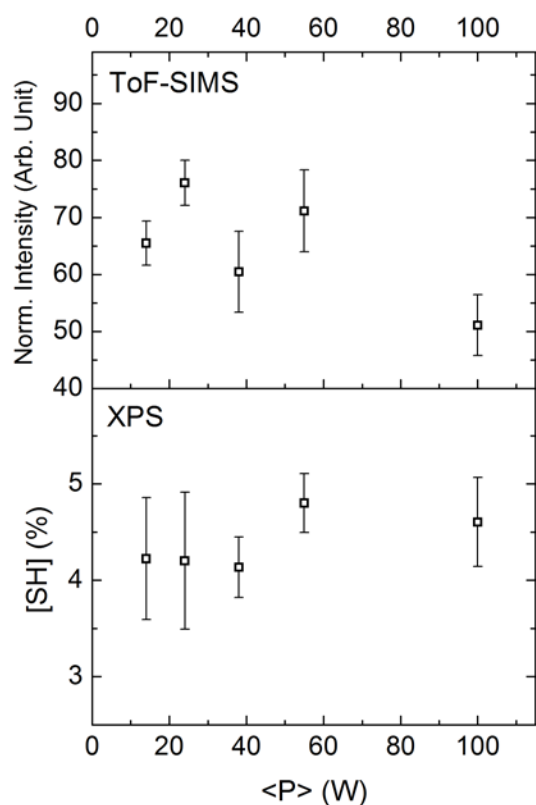

**Figure S3:** Evolution of the [SH] (calculated using equation 2) measured by XPS and the normalized ToF-SIMS intensity of peak corresponding to  $[C_6H_8NO_2S]^-$  as a function of <P>. The errors bars correspond to the standard deviations calculated from XPS and ToF-SIMS measurements using different areas on the sample's surface. For all the experiments, the duration reaction was fixed to 86h. This condition allows to reach a complete derivatization reaction.

**The Table S1** collects the elemental composition of the Pr-PPF as-deposited and after the chemical derivatization reaction during 86h. This condition allows to reach a complete derivatization reaction.

| <P><br>(W) | Pr-PPF as-deposited |            | Pr-PPF after CD during 86 h |            |            |           |           |
|------------|---------------------|------------|-----------------------------|------------|------------|-----------|-----------|
|            | %C                  | %S         | %C                          | %S         | %O         | %N        | [SH]      |
| 14         | 50.22 ±0.05         | 49.76±0.06 | 57.12±0.25                  | 29.16±0.49 | 11.51±0.13 | 2.2±0.53  | 4.22±0.88 |
| 38         | 64.42±0.52          | 34.57±0.52 | 65.43±1.7                   | 20.83±0.41 | 10.52±1.2  | 2.49±0.27 | 4.6±0.46  |
| 100        | 71.44±0.6           | 28.52±0.6  | 64.73±1.54                  | 23.07±0.87 | 9.55±1.73  | 2.14±0.13 | 4.13±0.31 |
